# Supplementary material for: Cell type boundaries organize plant development
Source: eLife journal article supplement (doi:10.7554/elife.27421), 2017-09-12
Supplement: supp [file elife-27421-supp-v1.zip]

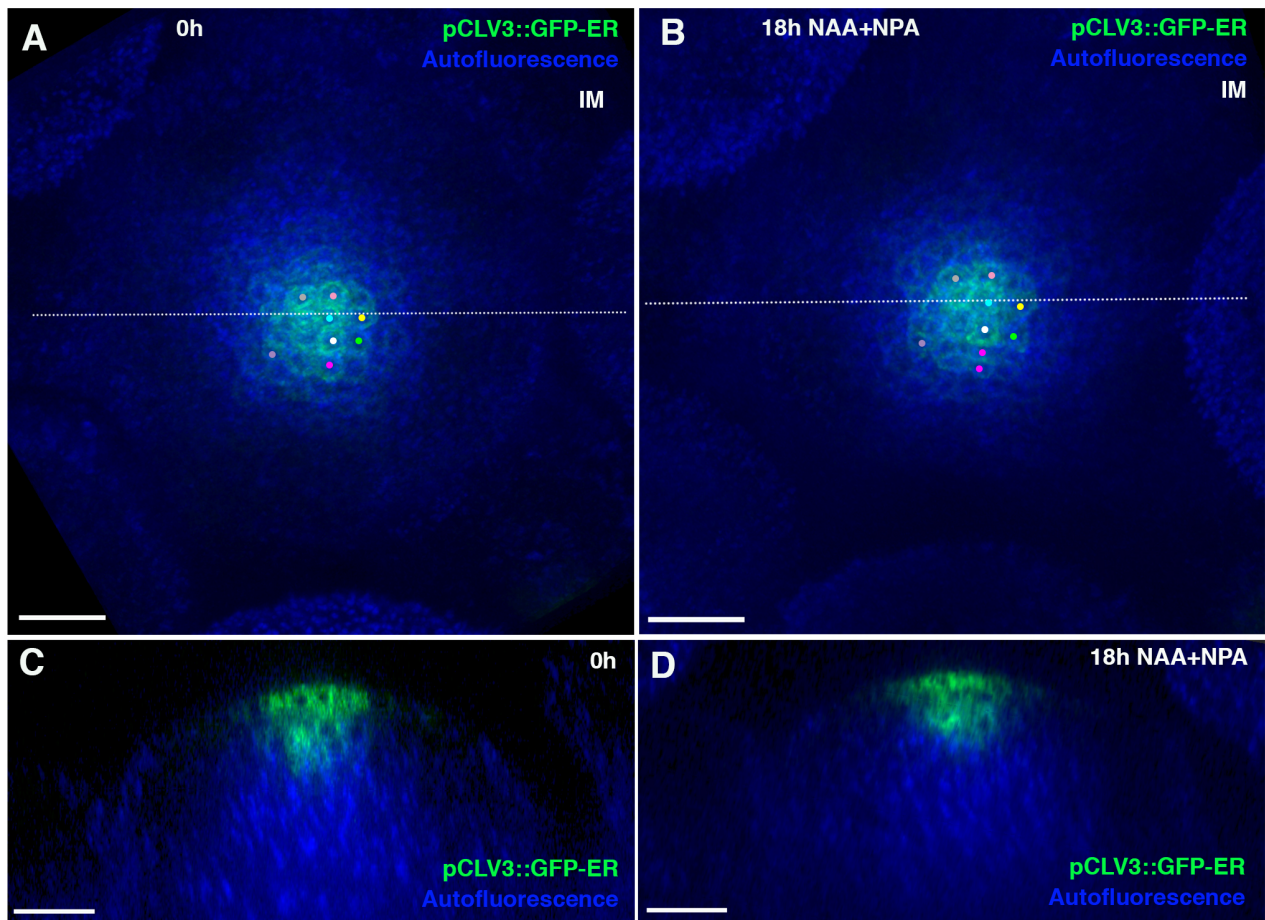

**Figure 10- Figure Supplement 3**  
**Auxin application does not expands CLAVATA3 expression and hence, the central zone of the meristem**
