# Supplementary material for: Cell type boundaries organize plant development
Source: eLife journal article supplement (doi:10.7554/elife.27421), 2017-09-12
Supplement: supp [file elife-27421-supp-v1.zip]

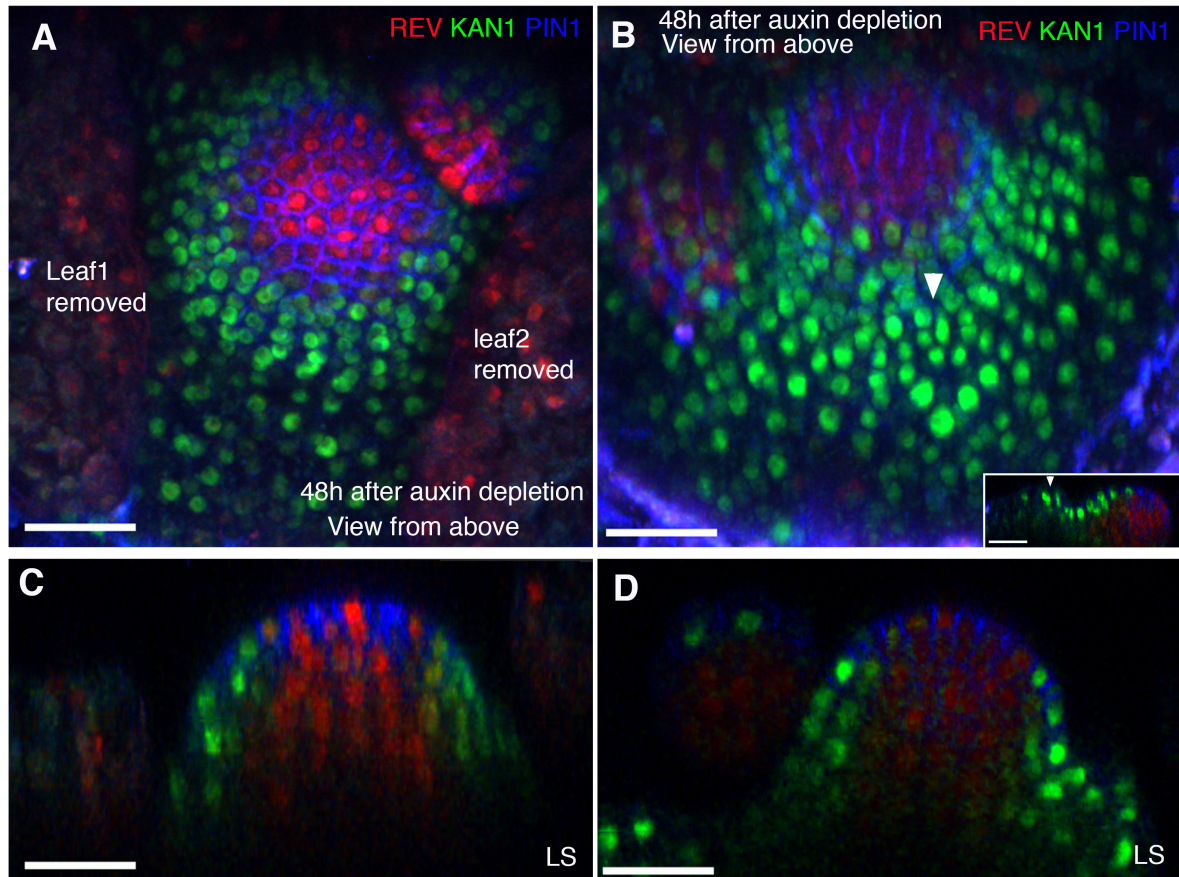

**Figure 12- Figure supplement 2**  
**Auxin depletion alters dorsoventral gene expression in the vegetative meristems**
