# Supplementary material for: Cell type boundaries organize plant development
Source: eLife journal article supplement (doi:10.7554/elife.27421), 2017-09-12
Supplement: supp [file elife-27421-supp-v1.zip]

Archive with 14 entries (14 files):
- elife_poa_e27421_Figure_13_Supplement_1.pdf
- elife_poa_e27421_Figure_12_Supplement_1.pdf
- elife_poa_e27421_Transparent_Reporting_File.pdf
- elife_poa_e27421_Supplementary_File_1.docx
- elife_poa_e27421_Figure_12_Supplement_3.pdf
- elife_poa_e27421_Movie_S1.mov
- elife_poa_e27421_Rich_Media_File_2.mov
- elife_poa_e27421_Supplementary_File_2_Model_files.zip
- elife_poa_e27421_Figure_10_Supplement_2.pdf
- elife_poa_e27421_Figure_10_Supplement_1.pdf
- elife_poa_e27421_Source_Data_File_for_Fig._8.docx
- elife_poa_e27421_Figure_12_Supplement_2.pdf
- elife_poa_e27421_Figure_10_Supplement_3.pdf
- elife_poa_e27421_Figure_1_Supplement_1.pdf
