# Supplementary material for: Cell type boundaries organize plant development
Source: eLife journal article supplement (doi:10.7554/elife.27421), 2017-09-12
Supplement: supp [file elife-27421-supp-v1.zip › elife_poa_e27421_Figure_1_Supplement_1.pdf]

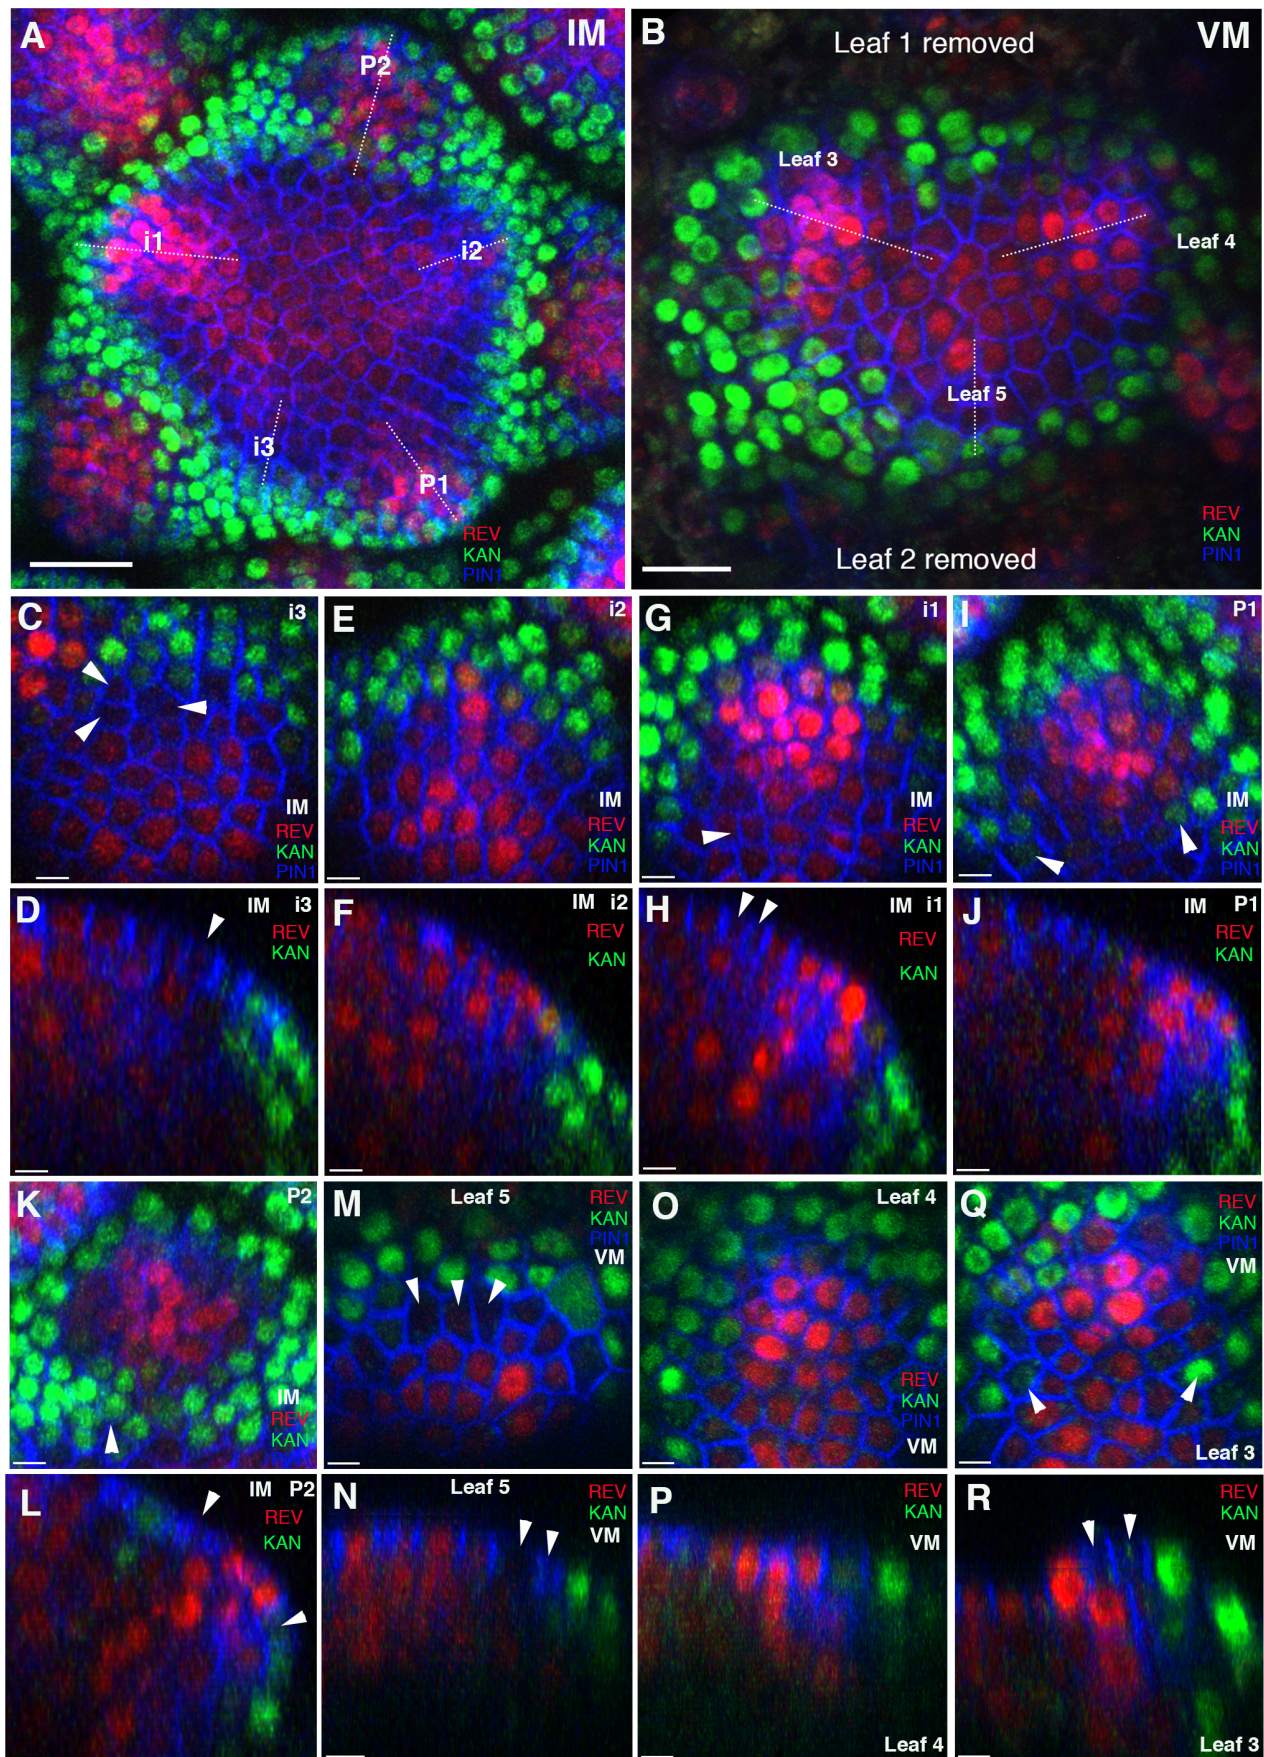

Figure 1- Figure Supplement 1

REV and KAN1 display dynamic expression pattern during different stages of organ development
