# Supplementary material for: Cell type boundaries organize plant development
Source: eLife journal article supplement (doi:10.7554/elife.27421), 2017-09-12
Supplement: supp [file elife-27421-supp-v1.zip › elife_poa_e27421_Figure_12_Supplement_3.pdf]

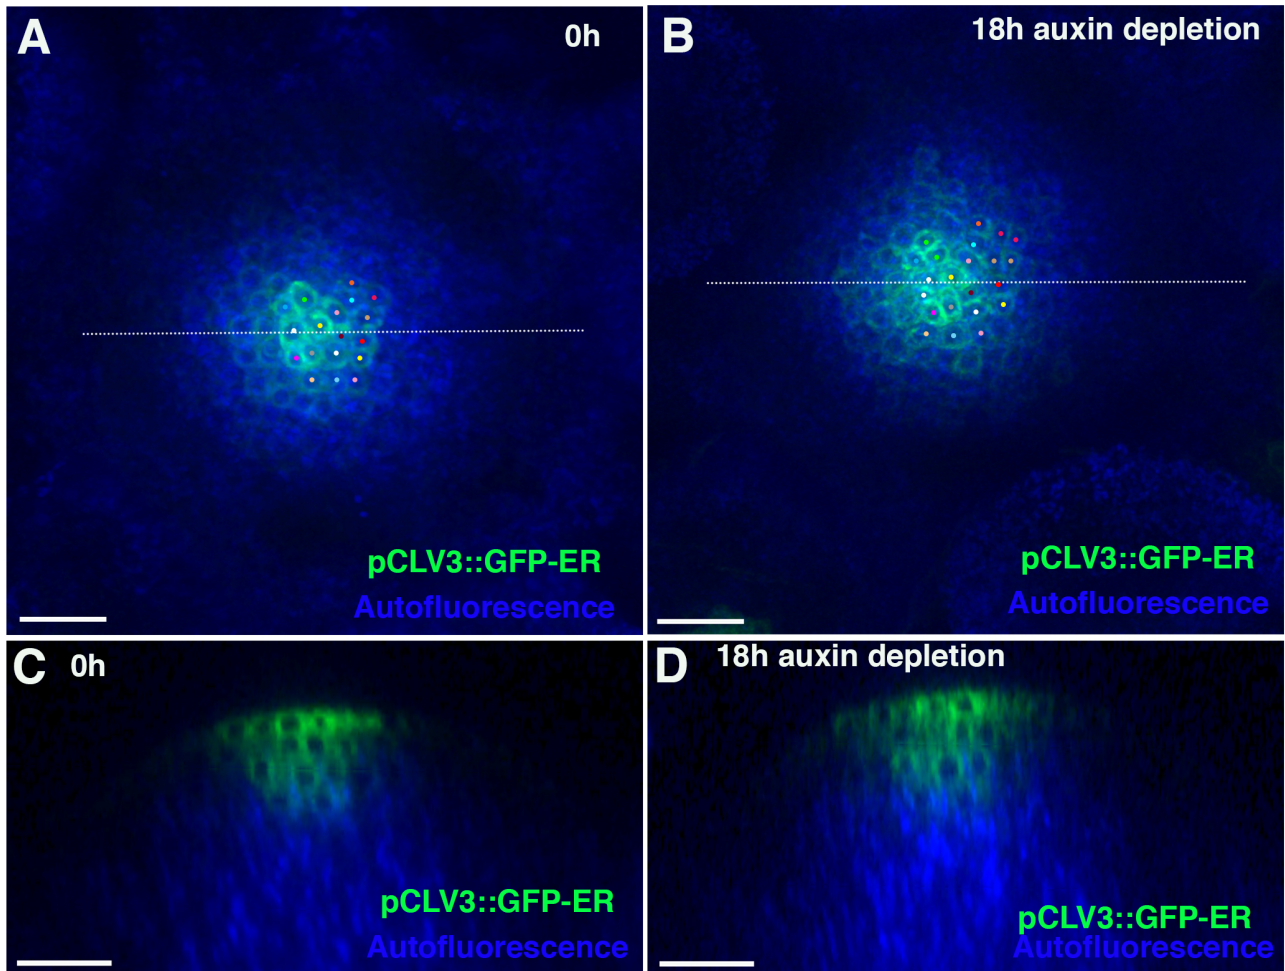

**Figure 12- Figure Supplement 3**

**Auxin depletion does not results in the shrinking of the central zone of the meristem**
