# Supplementary material for: Cell type boundaries organize plant development
Source: eLife journal article supplement (doi:10.7554/elife.27421), 2017-09-12
Supplement: supp [file elife-27421-supp-v1.zip › elife_poa_e27421_Figure_13_Supplement_1.pdf]

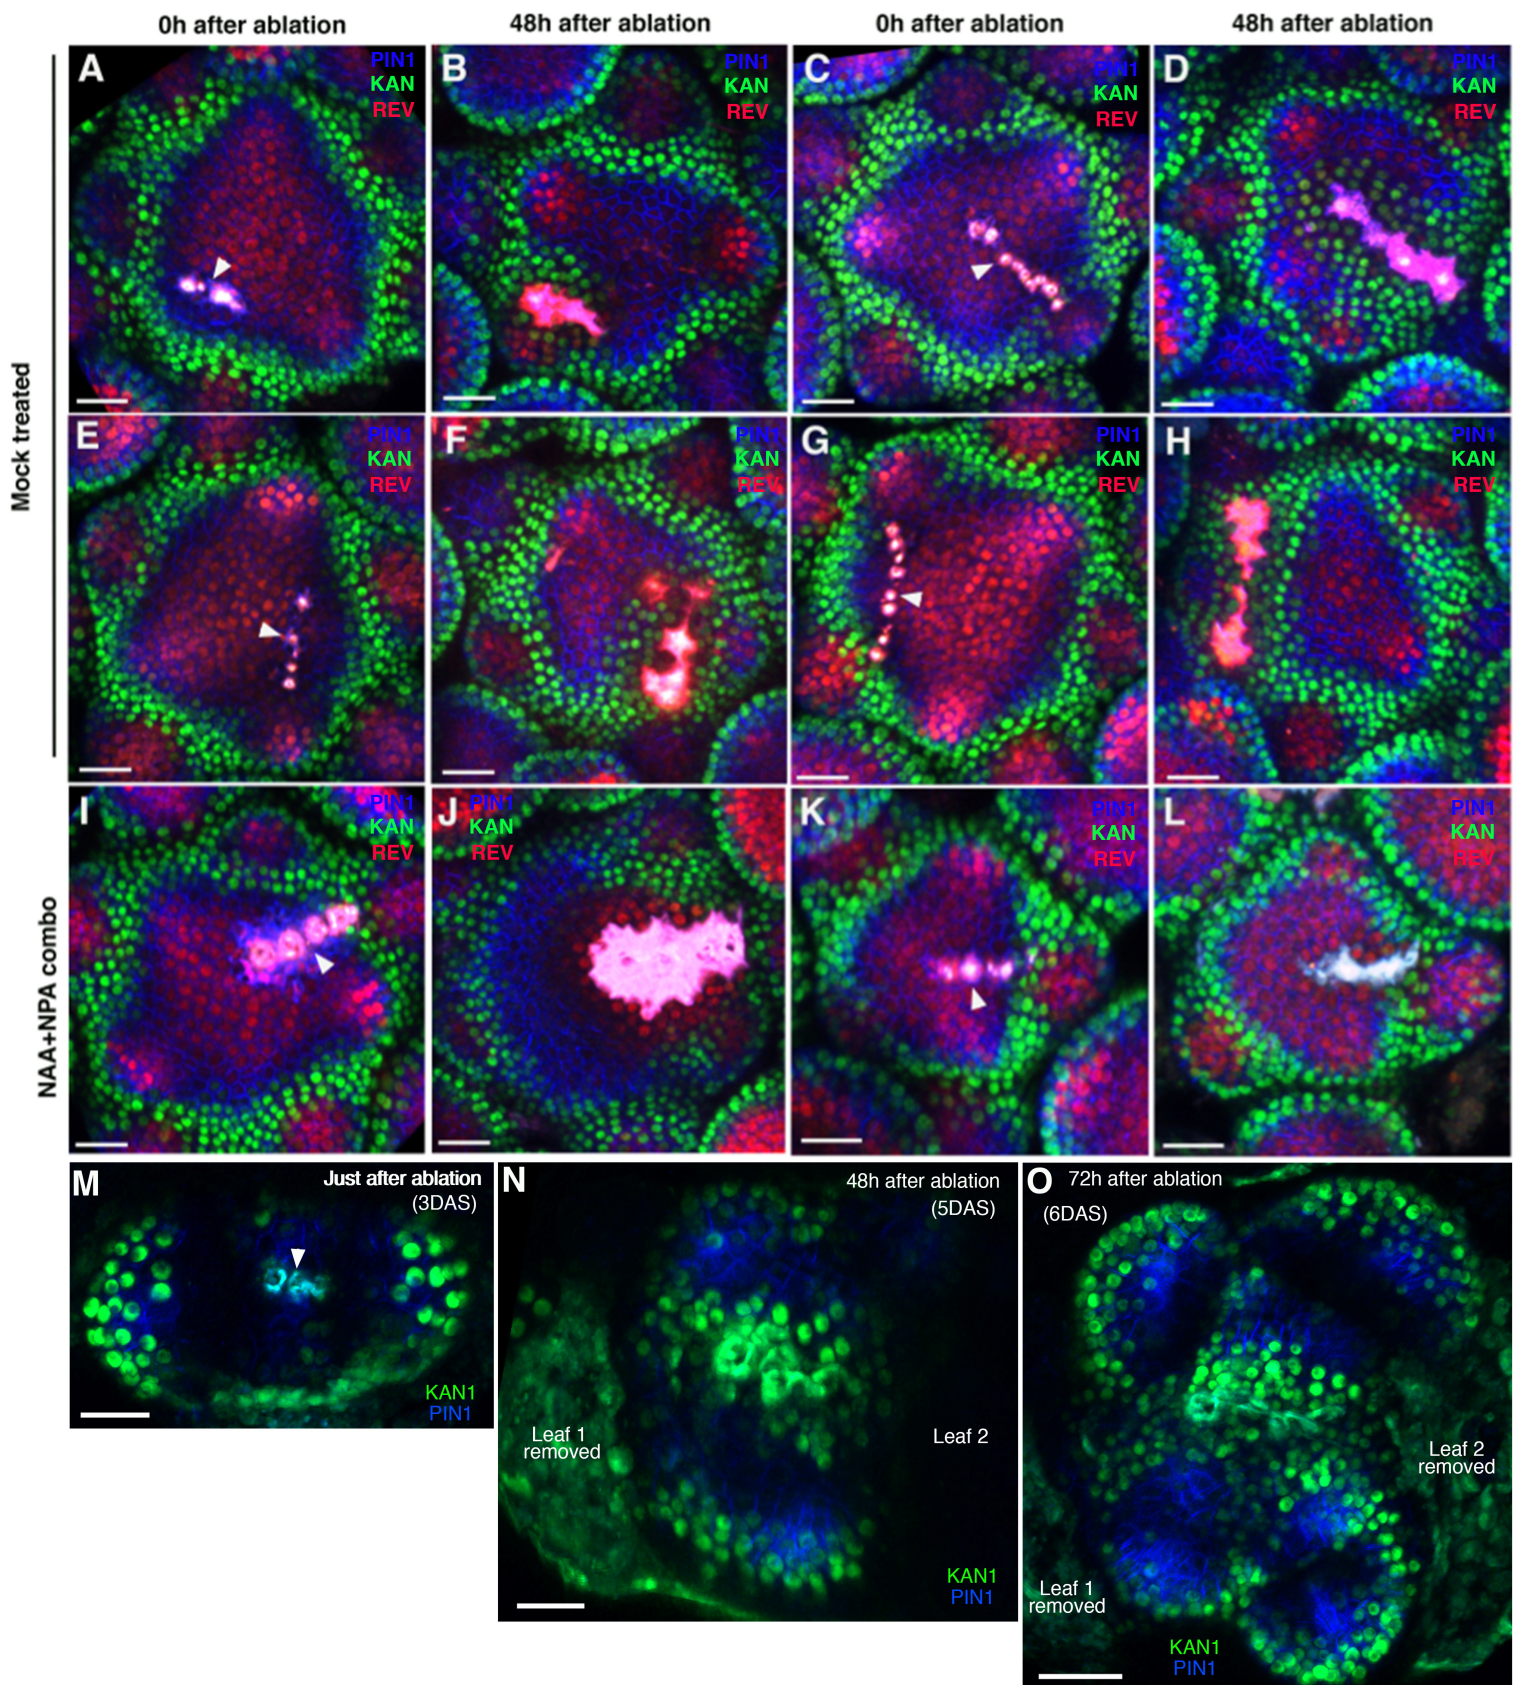

**Figure 13- Figure Supplement 1**  
**Wounding induces ectopic KAN expression in the inflorescence and vegetative meristems**
