# Supplementary figures and images for: Cell type boundaries organize plant development
Source: eLife journal article supplement (doi:10.7554/elife.27421), 2017-09-12

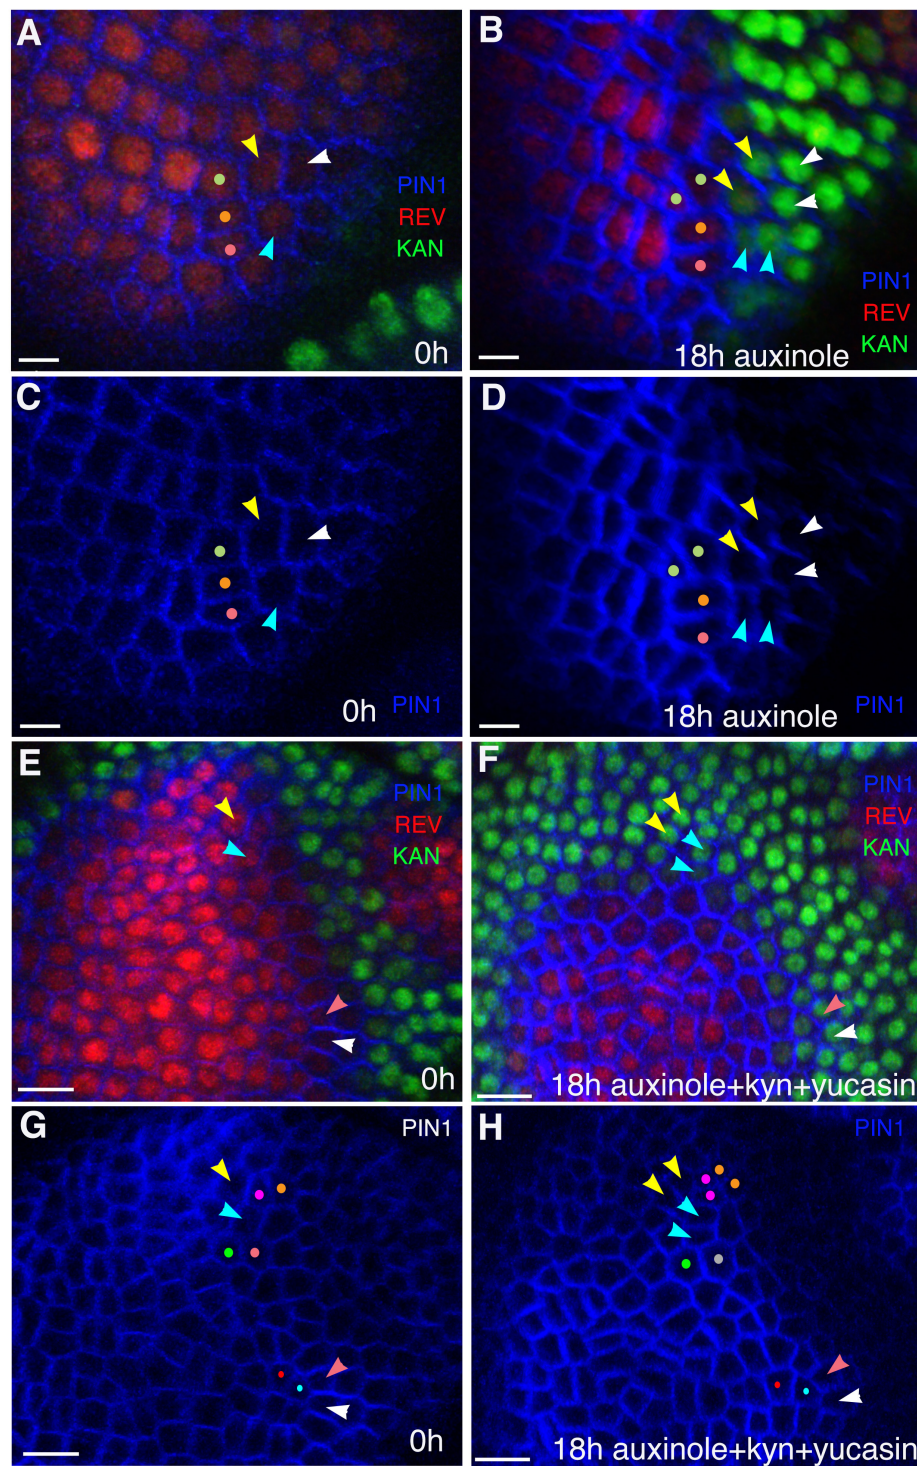

**Figure 12-Figure Supplement 1**  
**Auxin depletion results in KAN1 expression at the expense of REV**

Supplement: supp [file elife-27421-supp-v1.zip]

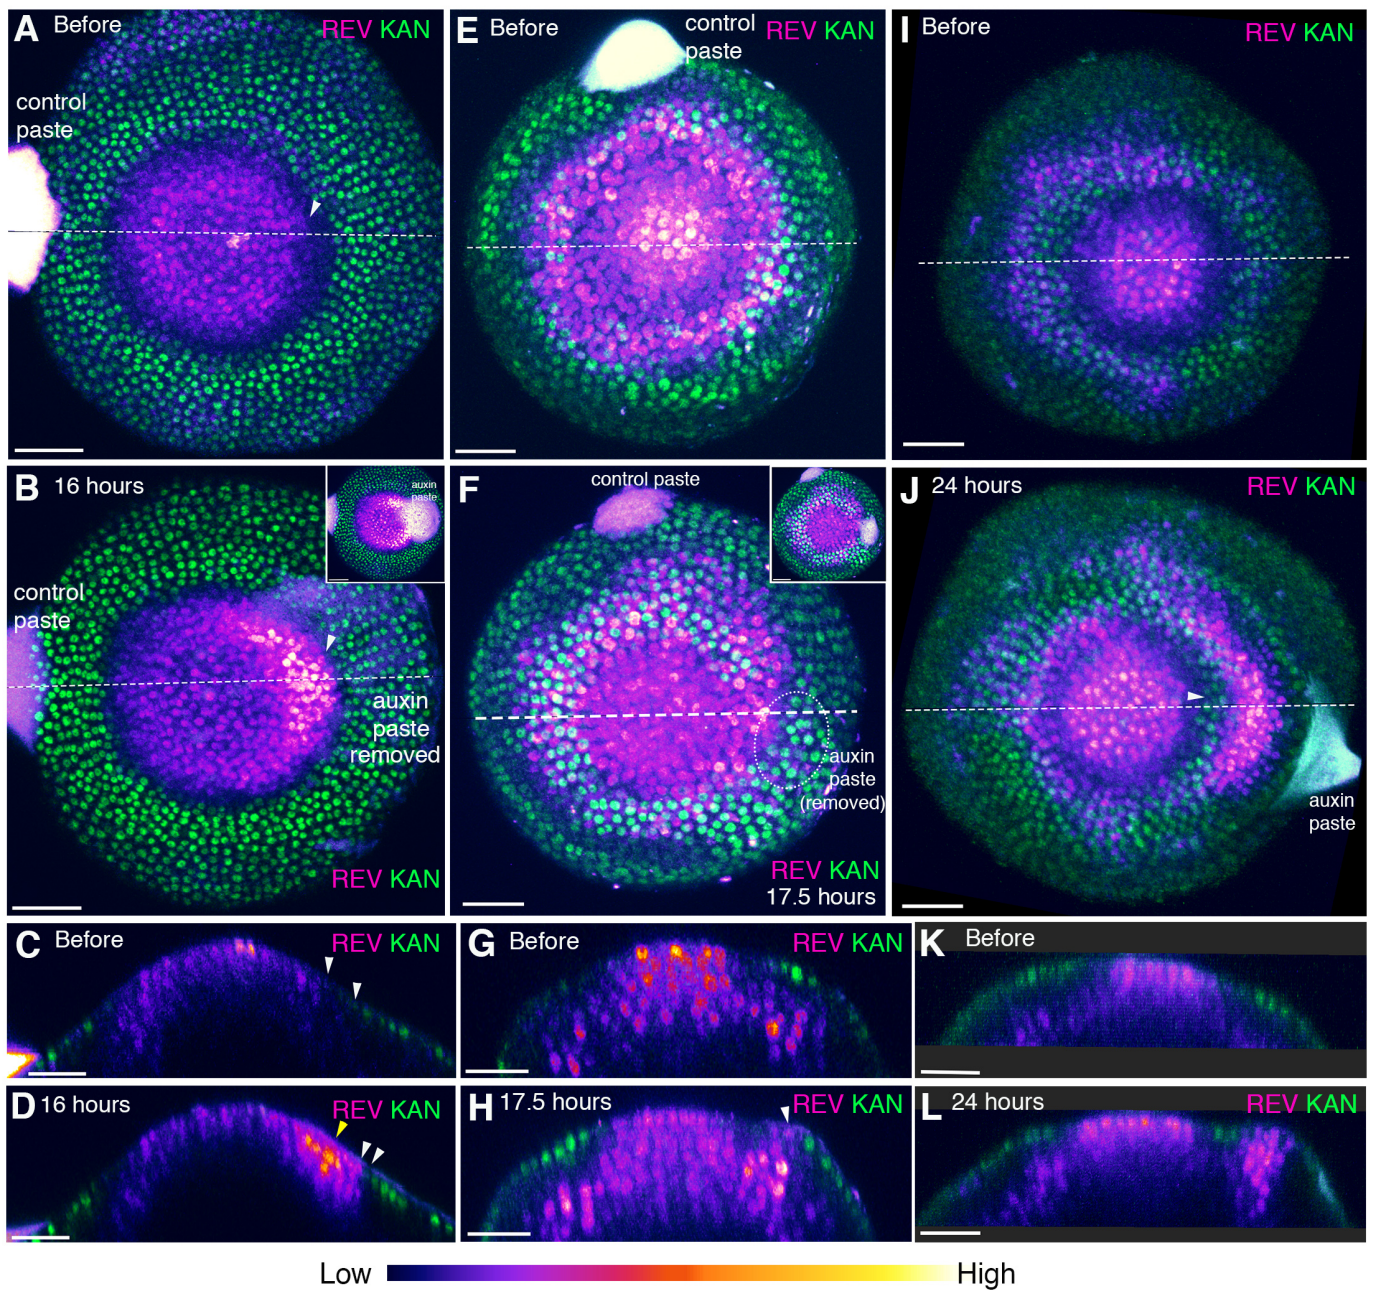

**Figure 10- Figure Supplement 2**  
**Local auxin application locally alters REV and KAN1 expression**

Supplement: supp [file elife-27421-supp-v1.zip › elife_poa_e27421_Figure_10_Supplement_2.pdf]

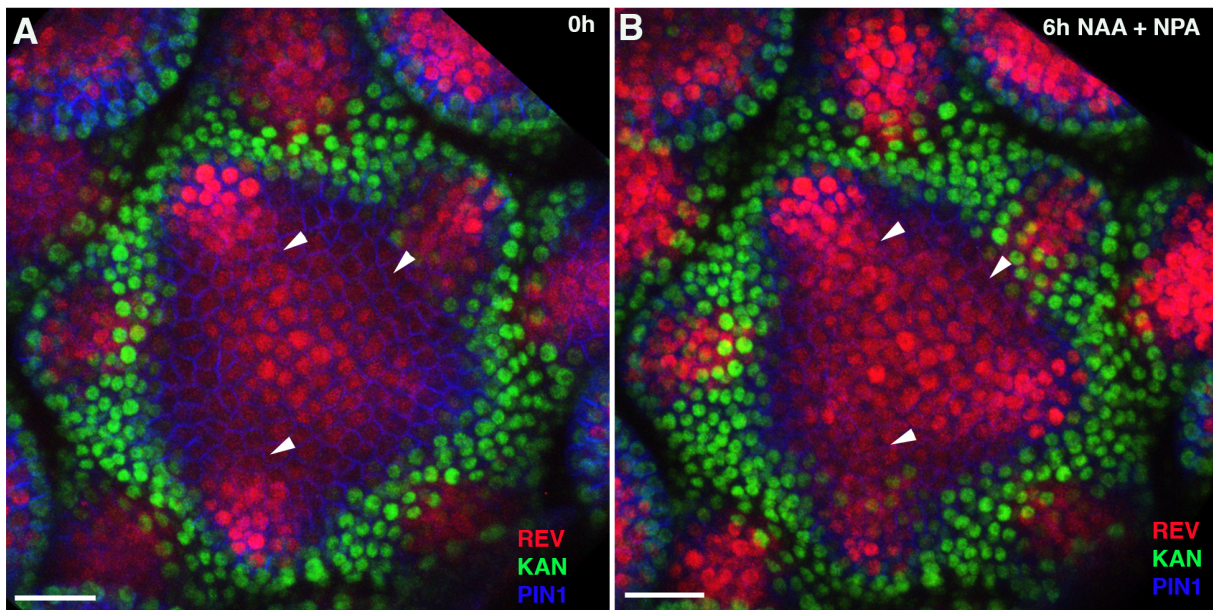

**Figure 10-Figure Supplement 1**

**REV expression starts to expand within 6hours of auxin treatment**

Supplement: supp [file elife-27421-supp-v1.zip › elife_poa_e27421_Figure_10_Supplement_1.pdf]
